# Supplementary material for: Integrated Bioinformatic Analysis Identifies Networks and Promising Biomarkers for Hepatitis B Virus-Related Hepatocellular Carcinoma
Source: Hindawi journal article supplement (doi:10.1155/2020/2061024), 2020-07-28
Supplement: f1 [file 2061024.f1.pdf]

**Table S1.** Summary of Gene ontology (GO) enrichment terms related to the differentially expressed genes (DEGs)

| Category | Term       | Description              | Count | P-Value  | Genes                                                                                                                                                                                                                                                                                                                                                                                                                                                                                                                                                                                                                                                                                                                                                                                                                                                                                                                                                                                                                                                                                                                                                                                                                                                                                                             |
|----------|------------|--------------------------|-------|----------|-------------------------------------------------------------------------------------------------------------------------------------------------------------------------------------------------------------------------------------------------------------------------------------------------------------------------------------------------------------------------------------------------------------------------------------------------------------------------------------------------------------------------------------------------------------------------------------------------------------------------------------------------------------------------------------------------------------------------------------------------------------------------------------------------------------------------------------------------------------------------------------------------------------------------------------------------------------------------------------------------------------------------------------------------------------------------------------------------------------------------------------------------------------------------------------------------------------------------------------------------------------------------------------------------------------------|
| BP       | GO:0051301 | Cell division            | 12    | 1.13E-04 | <i>FAM83D</i> , <i>CCNB1</i> ,<br><i>CDK1</i> , <i>CCNB2</i> , <i>ZWINT</i> ,<br><i>TPX2</i> , <i>BIRC5</i> , <i>AURKA</i> ,<br><i>PTTG1</i> , <i>UBE2C</i> , <i>ASPM</i>                                                                                                                                                                                                                                                                                                                                                                                                                                                                                                                                                                                                                                                                                                                                                                                                                                                                                                                                                                                                                                                                                                                                         |
| BP       | GO:0007067 | Mitotic nuclear division | 8     | 0.003429 | <i>FAM83D</i> , <i>CDK1</i> ,<br><i>CCNB2</i> , <i>ZWINT</i> ,<br><i>CENPW</i> , <i>PTTG1</i> , <i>ASPM</i>                                                                                                                                                                                                                                                                                                                                                                                                                                                                                                                                                                                                                                                                                                                                                                                                                                                                                                                                                                                                                                                                                                                                                                                                       |
| BP       | GO:0006954 | Inflammatory response    | 11    | 0.00705  | <i>CCL2</i> , <i>CCL20</i> , <i>CRHBP</i> ,<br><i>KLKB1</i> , <i>CXCL2</i> ,<br><i>TBXA2R</i> , <i>CCL19</i> , <i>CCL5</i> ,<br><i>CXCL12</i> , <i>ECM1</i>                                                                                                                                                                                                                                                                                                                                                                                                                                                                                                                                                                                                                                                                                                                                                                                                                                                                                                                                                                                                                                                                                                                                                       |
| CC       | GO:0070062 | Extracellular exosome    | 86    | 2.82E-13 | <i>STEAP4</i> , <i>NAMPT</i> ,<br><i>S100A8</i> , <i>MASP2</i> ,<br><i>SORL1</i> , <i>ANO1</i> , <i>CRP</i> ,<br><i>SPINK1</i> , <i>CXCL12</i> ,<br><i>BBOX1</i> , <i>PRKAR2B</i> ,<br><i>TP53I3</i> , <i>GPC3</i> , <i>TKFC</i> ,<br><i>LCAT</i> , <i>PGLYRP2</i> , <i>PROZ</i> ,<br><i>SERPINA4</i> , <i>SHBG</i> , <i>F11</i> ,<br><i>ALDH6A1</i> , <i>CDK1</i> ,<br><i>CDHR2</i> , <i>FBP1</i> , <i>LIFR</i> ,<br><i>IGFALS</i> , <i>F9</i> , <i>CFTR</i> ,<br><i>SLC3A1</i> , <i>THY1</i> , <i>C8A</i> ,<br><i>C8B</i> , <i>RND3</i> , <i>CTH</i> ,<br><i>TACSTD2</i> , <i>SERPINF2</i> ,<br><i>BHMT</i> , <i>HAO2</i> , <i>HSPB1</i> ,<br><i>CA2</i> , <i>STMN1</i> , <i>AKR1D1</i> ,<br><i>SLC27A2</i> , <i>C7</i> , <i>ACADSB</i> ,<br><i>C9</i> , <i>ASS1</i> , <i>LUM</i> , <i>C6</i> ,<br><i>PTH1R</i> , <i>JCHAIN</i> , <i>DPYS</i> ,<br><i>KMO</i> , <i>SFN</i> , <i>ARG1</i> ,<br><i>ANGPTL6</i> , <i>KLKB1</i> ,<br><i>ENO3</i> , <i>HRG</i> , <i>SLC39A5</i> ,<br><i>SPP2</i> , <i>SPP1</i> , <i>DPT</i> ,<br><i>THBS4</i> , <i>GPD1</i> , <i>HOGA1</i> ,<br><i>EPHX2</i> , <i>FTCD</i> , <i>ACMSD</i> ,<br><i>CD5L</i> , <i>TKT</i> , <i>RACGAP1</i> ,<br><i>ECM1</i> , <i>MAN1C1</i> , <i>PCK1</i> ,<br><i>A1BG</i> , <i>LYVE1</i> , <i>AFM</i> ,<br><i>GLYAT</i> , <i>HPX</i> , <i>FBLN5</i> , |

|    |            |                      |    |          |                                                                                                                                                                                                                                                                   |
|----|------------|----------------------|----|----------|-------------------------------------------------------------------------------------------------------------------------------------------------------------------------------------------------------------------------------------------------------------------|
| CC | GO:0072562 | Blood microparticle  | 13 | 7.61E-09 | <i>PONI, CP, HPGD, IGFBP3, FABP5</i>                                                                                                                                                                                                                              |
| CC | GO:0005615 | Extracellular space  | 39 | 2.25E-06 | <i>C9, JCHAIN, CD5L, C8A, A1BG, AFM, BCHE, HPX, SERPINF2, APOA5, PONI, HRG, CP</i>                                                                                                                                                                                |
| CC | GO:0005739 | Mitochondrion        | 29 | 0.002339 | <i>XDH, MBL2, CCL2, S100A8, ADAMTS13, CRHBP, LUM, CRP, CXCL2, SORL1, CD109, SPINK1, CCL5, PTGIS, CCL20, BCHE, ANG, KLKB1, PROZ, SERPINA4, ENO3, NRG1, SPP1, THBS4, DPT, F11, IGF1, CCL19, F9, DBH, ECM1, BMPER, SERPINF2, TACSTD2, FBLN5, PONI, HSPB1, IGFBP3</i> |
| CC | GO:0005576 | Extracellular region | 18 | 0.009137 | <i>ETNPPL, ACADSB, OGDHL, BBOX1, ACSL1, GSTZ1, SLC25A47, DMGDH, GPT2, FLVCR1, AADAT, ALDH6A1, GCDH, GPD1, CDK1, GABARAPL1, OTC, HOGA1, ACACB, ACADL, TAT, GLYAT, ANXA10, SDS, HAO2, AGXT2, SLC27A2, OAT, BCO2</i>                                                 |
| MF | GO:0020037 | Heme binding         | 14 | 8.69E-07 | <i>F11, C7, C6, PAMR1, CIR, COLEC11, PLG, LCN2, REG3A, CXCL14, PROZ, TEK, PONI, LECT2, DEFBI, TFPI2, GHR, SPP1</i>                                                                                                                                                |
|    |            |                      |    |          | <i>CYP2C18, IDO2, CYP26A1, CYP2E1, CYP4V2, CYP4A11, TDO2, PTGIS,</i>                                                                                                                                                                                              |

|    |            |                             |    |          |                                                                                                   |
|----|------------|-----------------------------|----|----------|---------------------------------------------------------------------------------------------------|
| MF | GO:0008009 | Chemokine activity          | 8  | 6.33E-06 | <i>CYP39A1, HRG, CYP4F2, CYP8B1, HBB, CCL2, CXCL14, CCL20, CXCL2, CCL19, CCL5, CXCL12</i>         |
| MF | GO:0016491 | Oxidoreductase activity     | 12 | 1.11E-05 | <i>XDH, HAO1, AKR1C3, AKR1B10, ADHIC, ADH6, HSD17B6, CP, MCM3, RDH16, AKR1D1</i>                  |
| MF | GO:0005506 | Iron ion binding            | 13 | 2.99E-05 | <i>XDH, CYP4A11, CYP39A1, PTGIS, CYP2C18, CYP26A1, CYP2E1, CYP4V2, CYP4F2, CYP8B1, HBB, BBOX1</i> |
| MF | GO:0030170 | Pyridoxal phosphate binding | 8  | 1.25E-04 | <i>ETNPPL, AADAT, CTH, SDS, AGXT2, TAT, GPT2, OAT</i>                                             |
| MF | GO:0042802 | Identical protein binding   | 9  | 0.006021 | <i>ETNPPL, UHRF1, ASS1, BCHE, FBP1, CIDEB, AGXT2, LECT2, OAT</i>                                  |

**Table S2.** Kyoto Encyclopedia of Genes and Genomes (KEGG) pathway analysis of differentially expressed genes (DEGs).

| Term     | Description        | Count | P-Value  | Genes                                                                                                                                                                                                                                                                                                                                                                                     |
|----------|--------------------|-------|----------|-------------------------------------------------------------------------------------------------------------------------------------------------------------------------------------------------------------------------------------------------------------------------------------------------------------------------------------------------------------------------------------------|
| bta01100 | Metabolic pathways | 65    | 2.46E-10 | <i>ETNPPL, NAMPT, CNDP1, CYP2C18, OGDHL, ADHIC, TDO2, PTGIS, TKFC, GSTZ1, GPT2, HPD, AADAT, ALDH6A1, OTC, FBP1, CYP26A1, CYP2E1, ACADL, TAT, CTH, SDS, PANK1, SQLE, AKR1B10, BHMT, HAO2, OAT, AKR1D1, SLC27A5, XDH, ACADSB, HSD17B2, FOLH1B, ASS1, ADH6, DPYS, KMO, GLS2, ARG1, ACSL1, ADH4, ENO3, CDA, DMGDH, HSD17B6, GCDH, HOGA1, EPHX2, ACMSD, FTCD, IDO2, TKT, ACACB, DBH, CPS1,</i> |

|          |                                          |    |          |  |                                                                                                          |
|----------|------------------------------------------|----|----------|--|----------------------------------------------------------------------------------------------------------|
|          |                                          |    |          |  | <i>MANIC1, PCK1, GBA3, PHGDH, AGXT2, CYP4F2, CYP8B1, RDH16</i>                                           |
| bta04610 | Complement & coagulation cascades        | 14 | 1.64E-08 |  | <i>F11, C7, MBL2, C9, MASP2, C6, F9, C1R, PLG, C8A, C8B, FGA, SERPINF2, KLKB1</i>                        |
| bta01230 | Biosynthesis of amino acids              | 11 | 6.36E-06 |  | <i>ARG1, CTH, ASS1, SDS, OTC, PHGDH, ENO3, TKT, CPS1, TAT, GPT2</i>                                      |
| bta04976 | Bile secretion                           | 10 | 3.12E-05 |  | <i>SLCO1B3, SULT2A1, SLC22A7, KCNN2, CFTR, CA2, SLC51A, SLC27A5, SLC10A1, SLC22A1</i>                    |
| bta01130 | Biosynthesis of antibiotics              | 17 | 3.18E-05 |  | <i>AADAT, GCDH, ASS1, OTC, OGDHL, FBP1, TKT, TAT, PCK1, ARG1, CTH, SDS, SQLE, HAO2, PHGDH, ENO3, OAT</i> |
| bta04115 | p53 signaling pathway                    | 10 | 4.44E-05 |  | <i>STEAP3, CCNB1, CDK1, TP53I3, CDKN2A, CCNB2, IGF1, SFN, GADD45B, IGFBP3</i>                            |
| bta00220 | Arginine biosynthesis                    | 6  | 6.63E-05 |  | <i>GLS2, ARG1, ASS1, OTC, CPS1, GPT2</i>                                                                 |
| bta05020 | Prion diseases                           | 7  | 9.42E-05 |  | <i>C8A, EGRI, C8B, C7, C9, C6, CCL5</i>                                                                  |
| bta00380 | Tryptophan metabolism                    | 8  | 9.84E-05 |  | <i>AADAT, GCDH, TDO2, OGDHL, IDO2, ACMSD, KMO, INMT</i>                                                  |
| bta01200 | Carbon metabolism                        | 11 | 2.68E-04 |  | <i>ALDH6A1, TKFC, SDS, HAO2, OGDHL, PHGDH, FBP1, ENO3, TKT, CPS1, GPT2</i>                               |
| bta00350 | Tyrosine metabolism                      | 7  | 3.40E-04 |  | <i>ADH4, ADH1C, ADH6, GSTZ1, DBH, TAT, HPD</i>                                                           |
| bta00260 | Glycine, serine and threonine metabolism | 7  | 3.91E-04 |  | <i>CTH, SDS, BHMT, PHGDH, DMGDH, AGXT2, GNMT</i>                                                         |
| bta00071 | Fatty acid degradation                   | 7  | 3.91E-04 |  | <i>GCDH, ACADSB, ACSLI, ADH4, ADH1C, ADH6, ACADL</i>                                                     |
| bta03320 | PPAR signaling pathway                   | 8  | 0.001359 |  | <i>ACSL1, APOA5, CYP8B1, ACADL, SLC27A2, SLC27A5, FABP5, PCK1</i>                                        |
| bta00250 | Alanine, aspartate and                   | 6  | 0.001545 |  | <i>GLS2, ASS1, FOLH1B,</i>                                                                               |

---

|          |                      |    |          |                                                                      |
|----------|----------------------|----|----------|----------------------------------------------------------------------|
|          | glutamate metabolism |    |          | <i>AGXT2, CPS1, GPT2</i>                                             |
| bta00830 | Retinol metabolism   | 7  | 0.002098 | <i>CYP2C18, ADH4, ADH1C, ADH6, HSD17B6, CYP26A1, RDH16</i>           |
| bta04110 | Cell cycle           | 10 | 0.003013 | <i>CCNB1, CDK1, CDKN2A, CCNB2, CDKN2C, SFN, PTTG1, MCM3, GADD45B</i> |

---
